# Supplementary material for: Gut Organoid as a New Platform to Study Alginate and Chitosan Mediated PLGA Nanoparticles for Drug Delivery
Source: MDPI journal article supplement (doi:10.3390/md19050282), 2021-05-20
Supplement: s1 [file s1]

# Gut Organoid as a New Platform to Study Alginate and Chitosan Mediated PLGA Nanoparticles for Drug Delivery

Zahra Davoudi <sup>1</sup>, Nathan Peroutka-Bigus <sup>2</sup>, Bryan Bellaire <sup>2</sup>, Albert Jergens <sup>3</sup>, Michael Wannemuehler <sup>2</sup>, and Qun Wang <sup>1,\*</sup>

<sup>1</sup>*Department of Chemical and Biological Engineering, Iowa State University, Ames, IA 50011, United States*

<sup>2</sup>*Department of Vet Microbiology and Preventive Medicine, Iowa State University, Ames, IA 50011, United States*

<sup>3</sup>*Department of Veterinary Clinical Sciences, Iowa State University, Ames, IA 50011, United States*

## Supplementary Figure Legends

Supplementary Figure 1 The area of the organoids in cultures containing PLGA nanoparticles using alginate surfactants in a 6-day time scale. More than nine organoids tested for each sample.

Supplementary Figure 2 The area of the organoids in cultures containing PLGA nanoparticles using chitosan surfactants in a 6-day time scale. More than nine organoids tested for each sample.

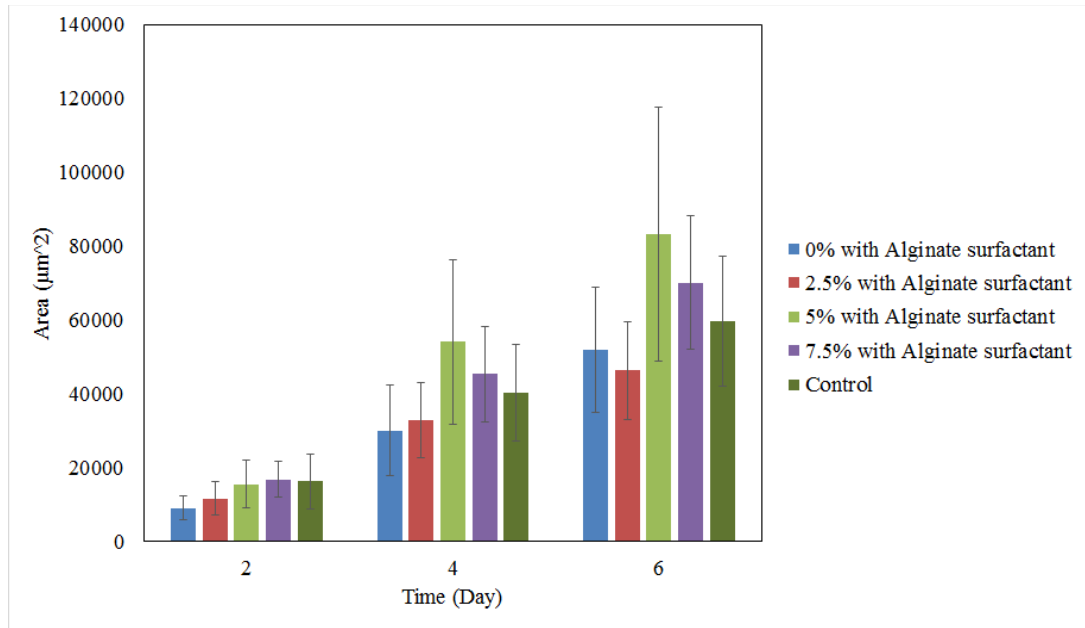

**Supplementary Figure 1.** The area of the organoids in cultures containing PLGA nanoparticles using alginate surfactants in a 6-day time scale. More than nine organoids tested for each sample.

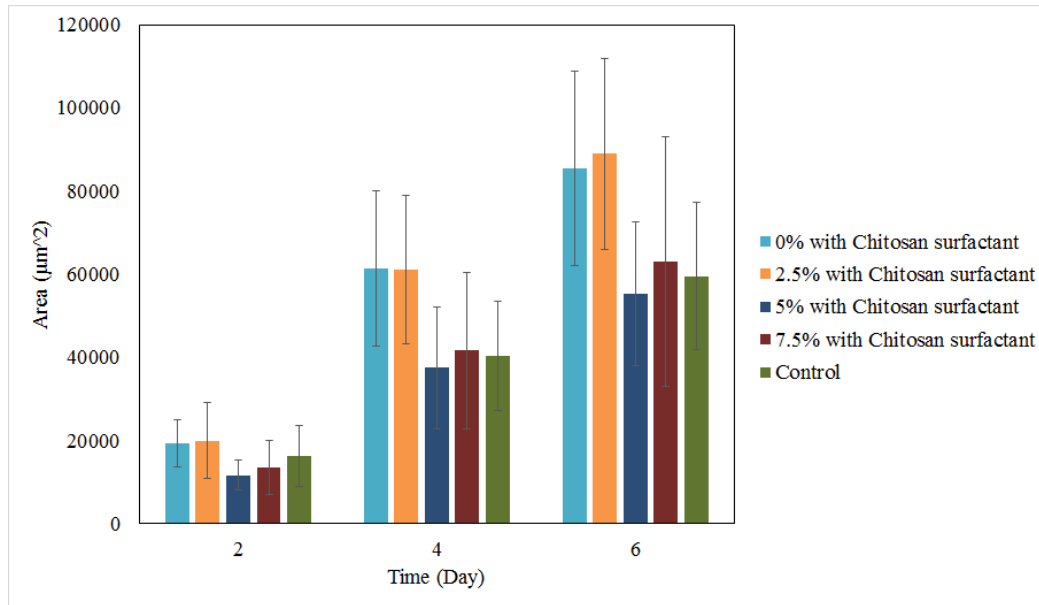

**Supplementary Figure 2.** The area of the organoids in cultures containing PLGA nanoparticles using chitosan surfactants in a 6-day time scale. More than nine organoids tested for each sample.
